# Supplementary material for: E-Selectin, ICAM-1, and ET-1 Biomarkers Address the Concern of the Challenging Diagnosis of Interstitial Lung Disease in Patients with Autoimmune Diseases
Source: MDPI journal article supplement (doi:10.3390/ijms241512518), 2023-08-07
Supplement: s1 [file s1]

## E-selectin, ICAM-1, and ET-1 biomarkers address the concern of the challenging diagnosis of interstitial lung disease in patients with autoimmune diseases

Verónica Pulito-Cueto<sup>1,2\*‡</sup>, Sara Remuzgo-Martínez<sup>3\*</sup>, Fernanda Genre<sup>3\*</sup>, Belén Atienza-Mateo<sup>1,2</sup>, Víctor M. Mora-Cuesta<sup>1,4</sup>, David Iturbe-Fernández<sup>1,4</sup>, Leticia Lera-Gómez<sup>5</sup>, María Sebastián Mora-Gil<sup>1,2</sup>, Virginia Portilla<sup>1,2</sup>, Alfonso Corrales<sup>1,2</sup>, Ricardo Blanco<sup>1,2</sup>, José M. Cifrián<sup>1,4,6</sup>, Miguel A. González-Gay<sup>3,6,7\*\*</sup> and Raquel López-Mejías<sup>1,2\*\*</sup>

*Additional file S1*

**Table S1.** Serum levels of E-selectin, ICAM-1, and ET-1 in all individuals of the study.

|                            | <i>E-selectin serum levels (ng/mL)</i><br>(Mean ± SD) | <i>ICAM-1 serum levels (ng/mL)</i><br>(Mean ± SD) | <i>ET-1 serum levels (pg/mL)</i><br>(Mean ± SD) |
|----------------------------|-------------------------------------------------------|---------------------------------------------------|-------------------------------------------------|
| <b>AD-ILD<sup>+</sup></b>  | 81.42 ± 30.65                                         | 532.60 ± 121.90                                   | 1.27 ± 0.61                                     |
| <b>RA-ILD<sup>+</sup></b>  | 77.55 ± 22.85                                         | 556.40 ± 125.40                                   | 1.17 ± 0.33                                     |
| <b>SSc-ILD<sup>+</sup></b> | 85.11 ± 36.79                                         | 507.70 ± 116.20                                   | 1.37 ± 0.80                                     |
| <b>AD-ILD<sup>-</sup></b>  | 60.72 ± 19.07                                         | 439.0 ± 77.03                                     | 0.99 ± 1.09                                     |
| <b>RA-ILD<sup>-</sup></b>  | 57.27 ± 14.55                                         | 465.40 ± 80.55                                    | 0.86 ± 0.21                                     |
| <b>SSc-ILD<sup>-</sup></b> | 64.87 ± 23.09                                         | 404.30 ± 57.30                                    | 1.14 ± 0.39                                     |
| <b>IPF</b>                 | 76.75 ± 20.81                                         | 527.40 ± 75.48                                    | 1.09 ± 0.38                                     |

ICAM-1: intercellular adhesion molecule 1; ET-1: endothelin 1; SD: standard deviation; AD: autoimmune disease; ILD: interstitial lung disease; RA: rheumatoid arthritis; SSc: systemic sclerosis; IPF: idiopathic pulmonary fibrosis.
